# Supplementary material for: Systematic Review and Meta-Analysis on Randomized Controlled Trials on Efficacy and Safety of Panax Notoginseng Saponins in Treatment of Acute Ischemic Stroke
Source: Evid Based Complement Alternat Med. 2021 Jul 9;2021:4694076. doi: 10.1155/2021/4694076 (PMC8289597; doi:10.1155/2021/4694076)
Supplement: Supplementary Materials — Supplementary File 1. Table S1 containing search strategy. Supplementary File 2. Table S2 containing the list of excluded reports. Supplementary File 3. Table S3 containing the basic characteristics of included studies. Supplementary File 4. Table S4 containing the basic characteristics of PNS preparations. Supplementary File 5. Table S5 containing a GRADE summary of outcomes. Supplementary File 6. PRISMA 2020 checklist. Supplementary File 7. Research protocol. [file 4694076.f1.zip]

Archive with 7 entries (7 files):
- 4694076.f1/Supplementary files 1.docx
- 4694076.f1/Supplementary files 2.docx
- 4694076.f1/Supplementary files 3.docx
- 4694076.f1/Supplementary files 4.docx
- 4694076.f1/Supplementary files 5.docx
- 4694076.f1/Supplementary files 6.docx
- 4694076.f1/Supplementary files 7.pdf
